# Supplementary material
Source: PubMed Central journal article supplement (PMC11034709)

**Figure 1.** SARS-CoV-2 Anti-Receptor Binding Domain Antibody Titers Among Those who withheld MMF compared to those continued MMF during SARS-CoV-2 vaccination

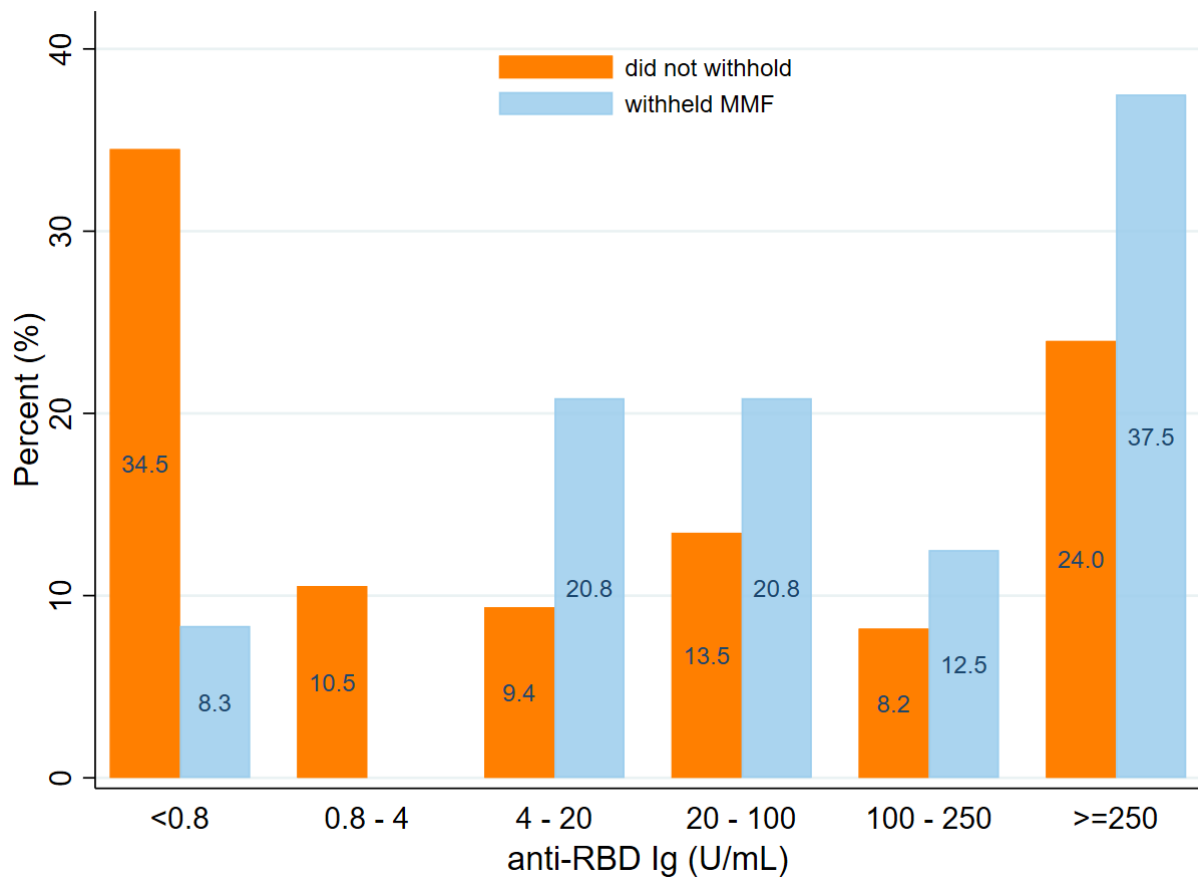

Supplement: NIHMS1980537-supplement-Figure_1_Supplemental.pdf [file NIHMS1980537-supplement-Figure_1_Supplemental.pdf]
