# Supplementary material
Source: PubMed Central journal article supplement (PMC11034709)
Supplement: NIHMS1980537-supplement-Supplemental_Table_1.pdf [file NIHMS1980537-supplement-Supplemental_Table_1.pdf]

**Supplemental Table 1.** Clinical characteristics of RMD participants taking mycophenolate stratified by withholding mycophenolate peri-vaccination

|                                              | <b>Continued mycophenolate<br/>(n=171)</b> | <b>Held mycophenolate<br/>(n=24)</b> | <b>p-value</b> |
|----------------------------------------------|--------------------------------------------|--------------------------------------|----------------|
| <b>Age, median (IQR)</b>                     | 45.7 (37.3, 58.4)                          | 51.1 (39.5, 58.4)                    | 0.5            |
| <b>Male sex, no. (%)</b>                     | 18 (10.5%)                                 | 2 (8.3%)                             | >0.99          |
| <b>Days from D2 to testing, median (IQR)</b> | 29.0 (28.0, 34.0)                          | 32.0 (28.0, 35.0)                    | 0.29           |
| <b>Non-white, no. (%)</b>                    | 27 (15.8%)                                 | 1 (4.2%)                             | 0.21           |
| <b>Diagnosis, no. (%)</b>                    |                                            |                                      | 0.001          |
| <b>Inflammatory arthritis*</b>               | 5 (2.9%)                                   | 2 (8%)                               |                |
| <b>Systemic lupus erythematosus</b>          | 56 (32.7%)                                 | 6 (25%)                              |                |
| <b>Sjögren's syndrome</b>                    | 3 (1.8%)                                   | 1 (4%)                               |                |
| <b>Myositis</b>                              | 24 (14.0%)                                 | 5 (21%)                              |                |
| <b>Systemic sclerosis</b>                    | 5 (2.9%)                                   | 4 (17%)                              |                |
| <b>Vasculitis†</b>                           | 6 (3.5%)                                   | 0 (0%)                               |                |
| <b>Other‡</b>                                | 35 (20.5%)                                 | 2 (8%)                               |                |
| <b>Overlap connective tissue disease§</b>    | 38 (22.2%)                                 | 4 (17%)                              |                |
| <b>Vaccine, no. (%)</b>                      |                                            |                                      | 0.09           |
| <b>Pfizer</b>                                | 91 (53.2%)                                 | 13 (54.2%)                           |                |
| <b>Moderna</b>                               | 75 (43.9%)                                 | 8 (33.3%)                            |                |
| <b>J&amp;J</b>                               | 5 (2.9%)                                   | 5 (2.9%)                             |                |
| <b>Therapy included in regimen, no. (%)</b>  |                                            |                                      |                |
| <b>Azathioprine</b>                          | 3 (1.8%)                                   | 1 (4.2%)                             | 0.41           |
| <b>Hydroxychloroquine</b>                    | 79 (46.2%)                                 | 5 (20.8%)                            | 0.03           |
| <b>Leflunomide</b>                           | 4 (2.3%)                                   | 0 (0.0%)                             | >0.99          |
| <b>Methotrexate</b>                          | 3 (1.8%)                                   | 0 (0.0%)                             | >0.99          |
| <b>Tacrolimus</b>                            | 11 (6.4%)                                  | 0 (0.0%)                             | 0.37           |
| <b>Abatacept</b>                             | 0 (0.0%)                                   | 3 (12.5%)                            | 0.002          |

|                                        |             |            |       |
|----------------------------------------|-------------|------------|-------|
| <b>Belimumab</b>                       | 18 (10.5%)  | 1 (4.2%)   | 0.48  |
| <b>Interleukin-17 inhibitor</b>        | 1 (0.6%)    | 0 (0.0%)   | >0.99 |
| <b>Rituximab</b>                       | 16 (9.4%)   | 2 (8.3%)   | >0.99 |
| <b>TNF inhibitor<sup>  </sup></b>      | 6 (3.5%)    | 1 (4.2%)   | >0.99 |
| <b>Tofacitinib</b>                     | 0 (0.0%)    | 1 (4.2%)   | 0.12  |
| <b>Glucocorticoid<sup>**</sup></b>     | 76 (44.4%)  | 9 (37.5%)  | 0.66  |
| <b>Immunomodulatory <sup>  </sup></b>  | 18 (10.5%)  | 1 (4.2%)   | 0.48  |
| <b>Combination therapy<sup>¶</sup></b> | 100 (58.5%) | 13 (54.2%) | 0.83  |

\* Rheumatoid arthritis, ankylosing spondylitis, psoriatic arthritis, reactive arthritis, or inflammatory bowel disease associated arthritis

† Polyarteritis nodosa, Behcet's syndrome, polymyalgia rheumatica, temporal arteritis, eosinophilic granulomatosis polyangiitis, granulomatous polyangiitis, Henoch-Schonlein purpura, microscopic polyangiitis, or Takayasu arteritis

‡ Includes Adult Onset Still's disease, connective tissue related interstitial lung disease, autoimmune hepatitis

§ Denotes a combination of two or more of the rheumatic conditions

<sup>||</sup> TNF inhibitors include adalimumab, certolizumab, etanercept, golimumab, and infliximab. Corticosteroid includes prednisone and prednisone equivalents. Immunomodulatory includes intravenous immunoglobulin (IVIg) and subcutaneous Immunoglobulin (SCIg).

<sup>\*\*</sup> Glucocorticoid includes prednisone and prednisone equivalents.

<sup>¶</sup> Denotes a combination of conventional DMARD, biologic, corticosteroid, or immunomodulatory therapy
